# Supplementary material
Source: bioRxiv or medRxiv preprint supplement (https://www.biorxiv.org/highwire/filestream/9058/field_highwire_adjunct_files/0/033852-1.pdf)
Supplement: Supplementary file [file 033852-1.pdf]

# The Equidistance Index of Population Structure

Yaron Granot<sup>\*1</sup>, Saharon Rosset<sup>2</sup>, and Karl Skorecki<sup>1</sup>

**1** Rappaport Faculty of Medicine and Research Institute, Technion–Israel Institute of Technology, and Rambam Medical Center, Haifa, Israel, **2** School of Mathematical Sciences Tel Aviv University, Tel Aviv, Israel

\* E-mail: [yarongranot@hotmail.com](mailto:yarongranot@hotmail.com)

## Supplemental Data

**Table S1.  $E_{STmin-max}$ ,  $F_{ST}$  and  $E_{BT}$  in 60 HGDP population pairs ranked by  $E_{BT}$**

| Population Pair              | Estmin | Estmean | Estmedian | Estmax | Fst   | E <sub>BT</sub> |
|------------------------------|--------|---------|-----------|--------|-------|-----------------|
| Surui vs. San                | 0.881  | 0.905   | 0.917     | 0.949  | 0.300 | 0.989           |
| Surui Family vs. San         | 0.937  | 0.958   | 0.969     | 0.984  | 0.377 | 0.986           |
| San vs. Han North            | 0.938  | 0.956   | 0.972     | 0.981  | 0.194 | 0.986           |
| Japanese vs. Yoruba          | 0.969  | 0.974   | 0.978     | 0.984  | 0.143 | 0.980           |
| Japanese vs. Mandenka        | 0.893  | 0.946   | 0.961     | 0.977  | 0.142 | 0.977           |
| Han South vs. Yoruba         | 0.969  | 0.972   | 0.976     | 0.985  | 0.143 | 0.976           |
| Italian vs. Yoruba           | 0.963  | 0.971   | 0.975     | 0.984  | 0.115 | 0.976           |
| Russian vs. Yoruba           | 0.958  | 0.966   | 0.970     | 0.979  | 0.117 | 0.971           |
| Surui vs. Tuscan             | 0.851  | 0.876   | 0.884     | 0.932  | 0.182 | 0.971           |
| Yoruba vs. San               | 0.831  | 0.883   | 0.930     | 0.947  | 0.079 | 0.962           |
| Surui vs. Mongola            | 0.765  | 0.803   | 0.815     | 0.893  | 0.147 | 0.954           |
| Surui vs. Russian            | 0.775  | 0.810   | 0.821     | 0.892  | 0.170 | 0.953           |
| French vs. Japanese          | 0.935  | 0.942   | 0.950     | 0.965  | 0.085 | 0.951           |
| Han North vs. Bantu Kenya    | 0.766  | 0.874   | 0.946     | 0.978  | 0.130 | 0.941           |
| Russian vs. Han South        | 0.935  | 0.940   | 0.948     | 0.965  | 0.075 | 0.937           |
| Surui vs. Yakut              | 0.673  | 0.711   | 0.737     | 0.852  | 0.150 | 0.922           |
| East Asia vs. Africa         | 0.678  | 0.802   | 0.870     | 0.939  | 0.131 | 0.921           |
| Europe vs. Amazon            | 0.606  | 0.679   | 0.703     | 0.746  | 0.141 | 0.914           |
| Papuan vs. Melanesian        | 0.367  | 0.602   | 0.731     | 0.950  | 0.071 | 0.914           |
| Mbuti vs. Biaka              | 0.465  | 0.699   | 0.822     | 0.878  | 0.043 | 0.911           |
| Surui vs. Karitiana          | 0.336  | 0.521   | 0.577     | 0.803  | 0.132 | 0.898           |
| Europe vs. Africa            | 0.611  | 0.792   | 0.873     | 0.941  | 0.112 | 0.895           |
| Surui vs. Pima               | 0.378  | 0.514   | 0.573     | 0.760  | 0.123 | 0.865           |
| Karitiana vs. Pima           | 0.300  | 0.537   | 0.629     | 0.851  | 0.106 | 0.857           |
| Kalash vs. Uygur             | 0.677  | 0.770   | 0.803     | 0.888  | 0.034 | 0.846           |
| Europe vs. East Asia         | 0.755  | 0.821   | 0.861     | 0.904  | 0.071 | 0.833           |
| Karitiana vs. Colombian      | 0.324  | 0.523   | 0.568     | 0.880  | 0.080 | 0.826           |
| Surui vs. Colombian          | 0.396  | 0.498   | 0.512     | 0.789  | 0.095 | 0.825           |
| Russian vs. Yakut            | 0.822  | 0.825   | 0.857     | 0.924  | 0.058 | 0.825           |
| Surui-A vs. Surui-B          | 0.390  | 0.532   | 0.559     | 0.770  | 0.175 | 0.819           |
| Papuan-A vs. Papuan-B        | 0.039  | 0.286   | 0.317     | 0.731  | 0.025 | 0.801           |
| Burusho vs. Kalash           | 0.337  | 0.542   | 0.610     | 0.793  | 0.024 | 0.789           |
| Lahu vs. Naxi                | -0.747 | 0.009   | 0.648     | 0.777  | 0.020 | 0.768           |
| Colombian vs. Pima           | 0.092  | 0.305   | 0.371     | 0.767  | 0.063 | 0.752           |
| Russian vs. Uygur            | 0.793  | 0.825   | 0.847     | 0.886  | 0.021 | 0.735           |
| Balochi vs. Kalash           | 0.380  | 0.549   | 0.639     | 0.768  | 0.023 | 0.713           |
| Russian vs. Burusho          | 0.489  | 0.621   | 0.677     | 0.801  | 0.017 | 0.682           |
| Uygur vs. Tuscan             | 0.809  | 0.851   | 0.877     | 0.919  | 0.027 | 0.681           |
| Russian vs. Sardinian        | 0.559  | 0.648   | 0.688     | 0.776  | 0.015 | 0.677           |
| Brahui vs. Kalash            | 0.377  | 0.478   | 0.577     | 0.751  | 0.025 | 0.663           |
| Karitiana vs. Maya           | 0.334  | 0.532   | 0.626     | 0.866  | 0.070 | 0.654           |
| Bantu S. Afr vs. San         | 0.751  | 0.820   | 0.873     | 0.930  | 0.057 | 0.648           |
| Surui vs. Maya               | 0.364  | 0.459   | 0.520     | 0.739  | 0.086 | 0.647           |
| Naxi vs. Yi                  | -1.324 | -0.250  | 0.686     | 0.791  | 0.004 | 0.638           |
| Hazara vs. Uygur             | -0.505 | 0.175   | 0.602     | 0.745  | 0.002 | 0.586           |
| Bantu S. Afr vs. Bantu Kenya | -0.881 | -0.056  | 0.479     | 0.809  | 0.006 | 0.553           |
| Mandenka vs. Yoruba          | -0.701 | 0.175   | 0.421     | 0.681  | 0.007 | 0.549           |
| Italian vs. Orcadian         | -0.615 | 0.106   | 0.455     | 0.699  | 0.005 | 0.547           |
| Cambodian vs. Naxi           | -0.503 | 0.209   | 0.794     | 0.878  | 0.014 | 0.537           |
| Pima vs. Maya                | 0.068  | 0.279   | 0.427     | 0.720  | 0.042 | 0.507           |
| Druze vs. Bedouin            | -0.531 | -0.053  | 0.189     | 0.660  | 0.009 | 0.485           |
| French vs. Sardinian         | 0.273  | 0.396   | 0.477     | 0.644  | 0.007 | 0.465           |
| Palestinian vs. Bedouin      | -0.627 | -0.187  | 0.023     | 0.627  | 0.006 | 0.420           |
| Russian vs. Adygei           | 0.348  | 0.421   | 0.504     | 0.663  | 0.009 | 0.415           |
| Druze vs. Palestinian        | -0.566 | -0.075  | 0.102     | 0.565  | 0.007 | 0.375           |
| Colombian vs. Maya           | -0.283 | -0.071  | 0.021     | 0.675  | 0.027 | 0.229           |
| Japanese vs. Han South       | 0.190  | 0.238   | 0.365     | 0.597  | 0.006 | 0.155           |
| French vs. Russian           | 0.092  | 0.201   | 0.319     | 0.524  | 0.004 | 0.152           |
| Cambodian vs. Mongola        | 0.465  | 0.581   | 0.634     | 0.791  | 0.013 | 0.130           |
| Italian vs. Tuscan           | -0.078 | 0.135   | 0.245     | 0.540  | 0.001 | 0.101           |

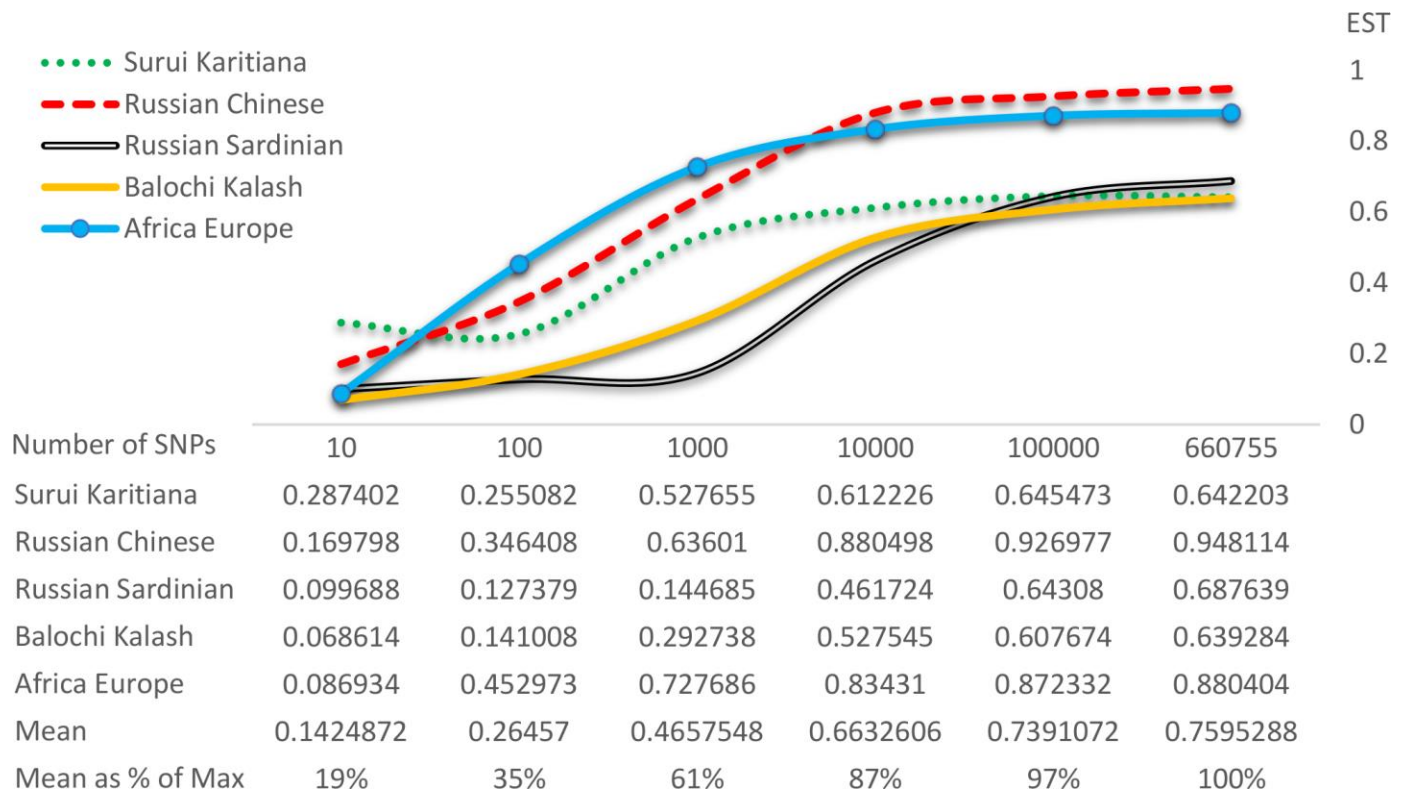

**Figure S1.  $E_{ST}$  median as a function of SNP sample size.**  $E_{ST}$  in various population pairs with increasing SNP sample size ranging from 10 to 660,755. As expected,  $E_{ST}$  initially rises rather steeply, however the results tend to plateau around 100,000 SNPs. This suggests that we are approaching the maximal resolving power, and adding more markers beyond this point is unlikely to significantly affect  $E_{ST}$  and cluster separation.

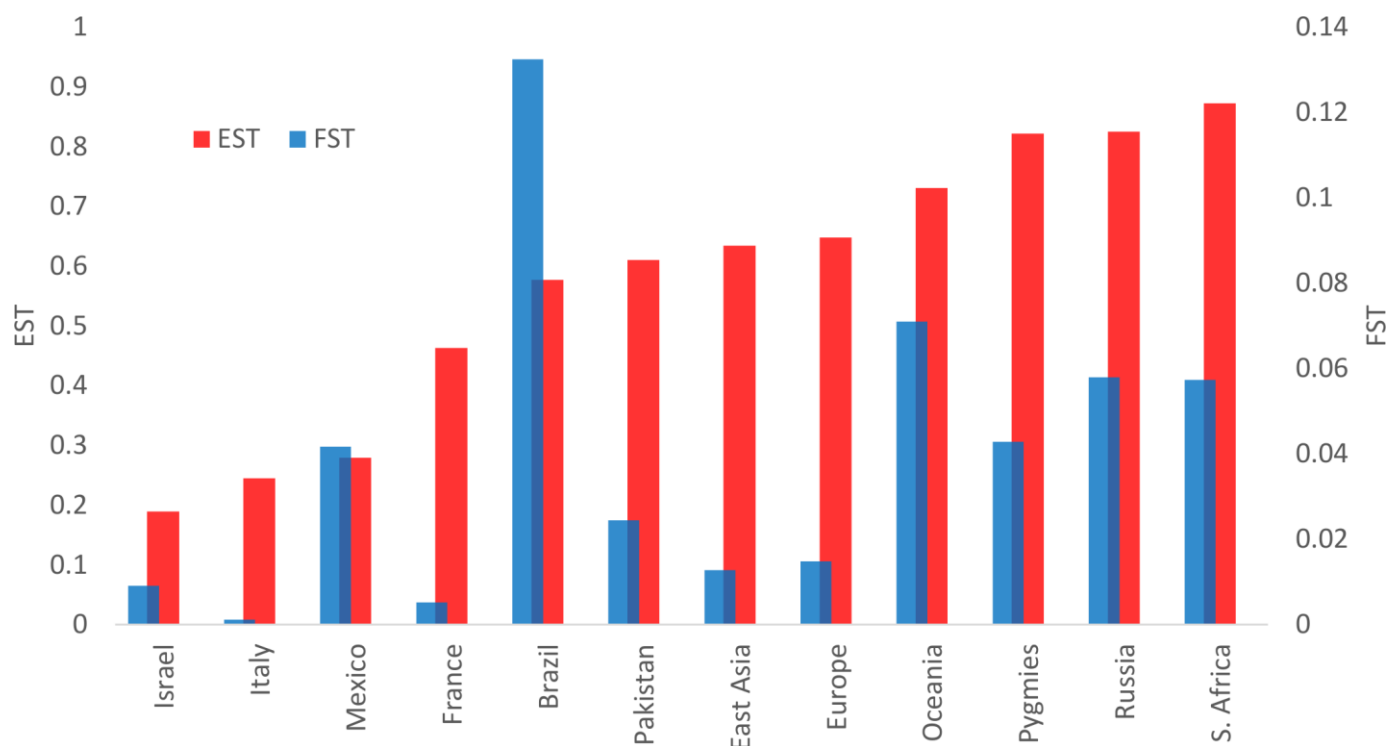

**Figure S2.  $F_{ST}$  and  $E_{ST}$  within 12 local regions.** Calculated from a single pair of HGDP populations per region: Israel (Bedouins vs. Druze), Italy (North Italians vs. Tuscans), Mexico (Maya vs. Pima), France (Basque vs. French), Brazil (Karitiana vs. Surui), Pakistan (Burusho vs. Kalash), East Asia (Cambodian vs. Mongola), Europe (Russians vs. Sardinians), Oceania (Melanesians vs. Papuans), Pygmies (Biaka vs. Mbuti), Russia (Russians vs. Yakut) and Southern Africans (South African Bantu vs. San). The most obvious discrepancy between  $F_{ST}$  and  $E_{ST}$  is in Brazil, with a high  $F_{ST}$  and moderate  $E_{ST}$ , and to a lesser extent between the Druze and Bedouins. Note that these Druze and Bedouins live within a few hundred kilometers of each other, speak the same language, and have the lowest  $E_{ST}$  among these 12 pairs, yet have a somewhat higher  $F_{ST}$  (several times higher than between the two Italian populations from Northern Italy and Tuscany and almost twice as high as between the French and Basques).

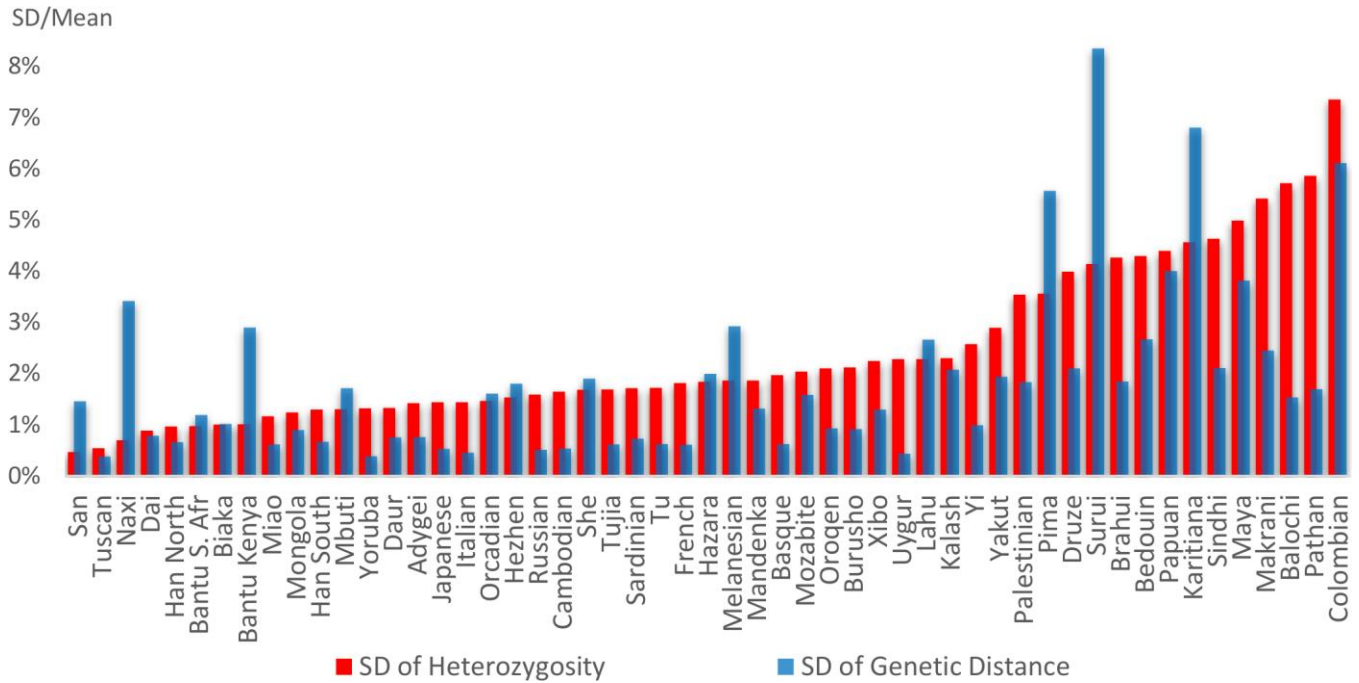

**Figure S3. Standard deviations (SD) of heterozygosity and pairwise distances (from 660,755 SNPs in 53 populations).** Excessive SD of genetic distance (blue) compared to SD of heterozygosity (red), as in the San and Naxi samples, implies the inclusion of relatives.

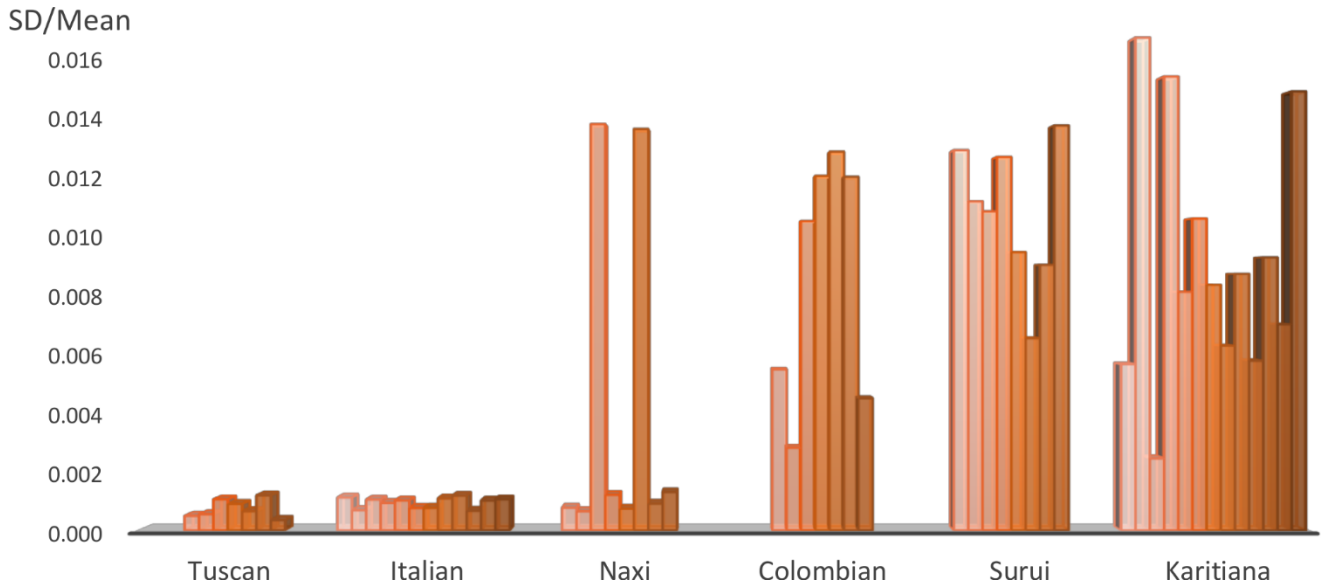

**Figure S4. Individual standard deviations in six HGDP populations.** Each column represents the standard deviation (SD) between a single individual and all other samples within the given population. Tuscans (n=7), Italians (n=12), Naxi (n=8), Colombian (n=7), Surui (n=8), and Karitiana (n=13). The “twin towers” in the Naxi batch are inferred to be a pair of close relatives in an otherwise panmictic population sample. These two individuals stick out like a sore thumb, while similarly related individuals are not nearly as obvious among the Native American samples due to a higher base-level of structure in these population samples. This can be used as a quick way of visually identifying ascertainment bias.

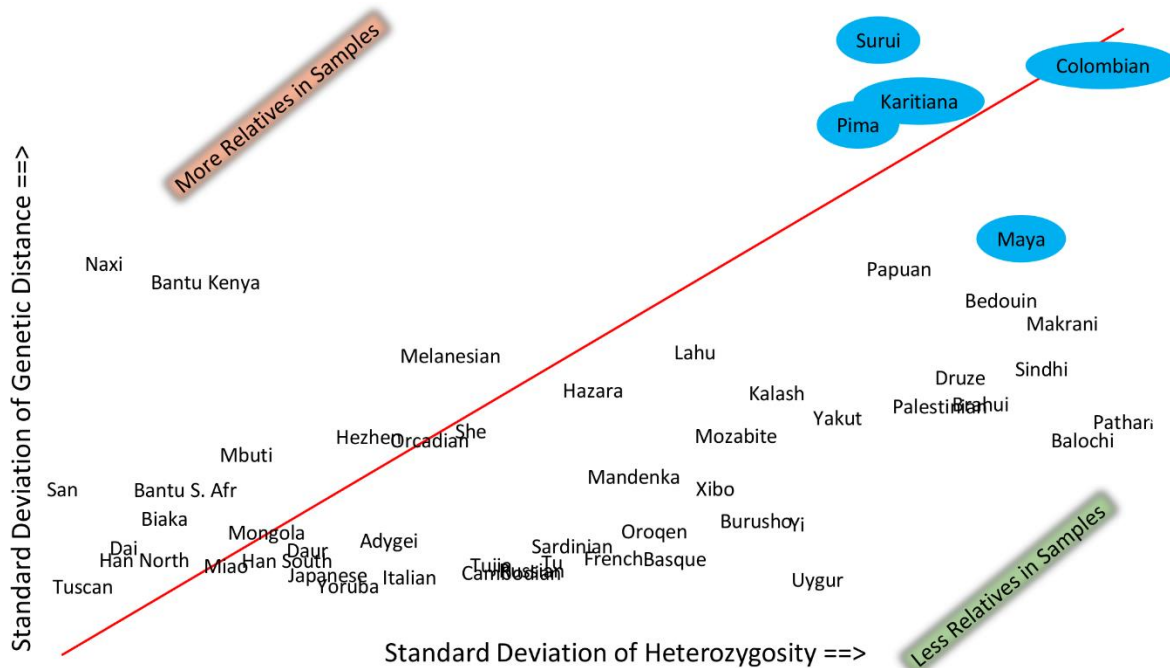

**Figure S5. The SD of pairwise distance plotted against the SD of heterozygosity (938 individuals from 53 populations).** The red diagonal line represents the linear trend line of the standard deviation of heterozygosity. Populations above this line are inferred to have more genetic structure than expected from heterozygosity, implying that relatives may have been included in the samples. Native American populations, highlighted in light blue, appear to have moderate or moderately high levels of relatives included among their samples.

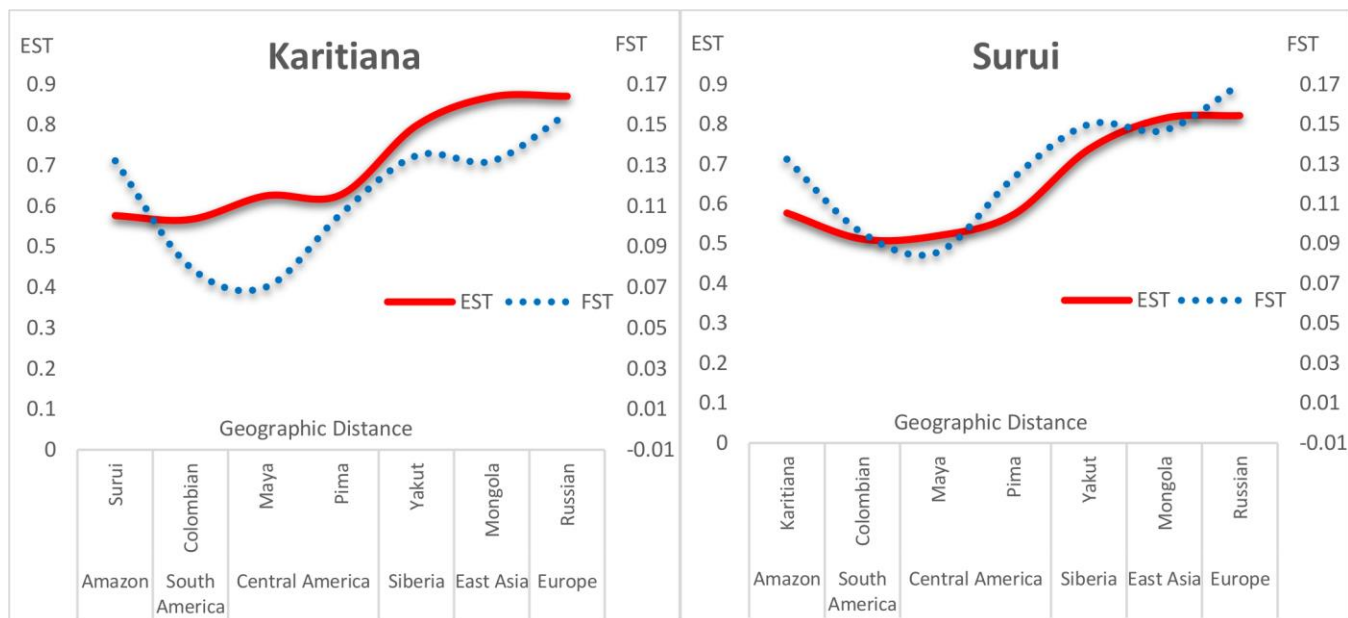

**Figure S6. Pairwise  $F_{ST}$  and  $E_{ST}$  vs. geographic distance from the two Amazonian tribes to various global populations with increasing distance from the Amazon.** Note the initial steep drop in  $F_{ST}$  with increased distance from the Amazon.

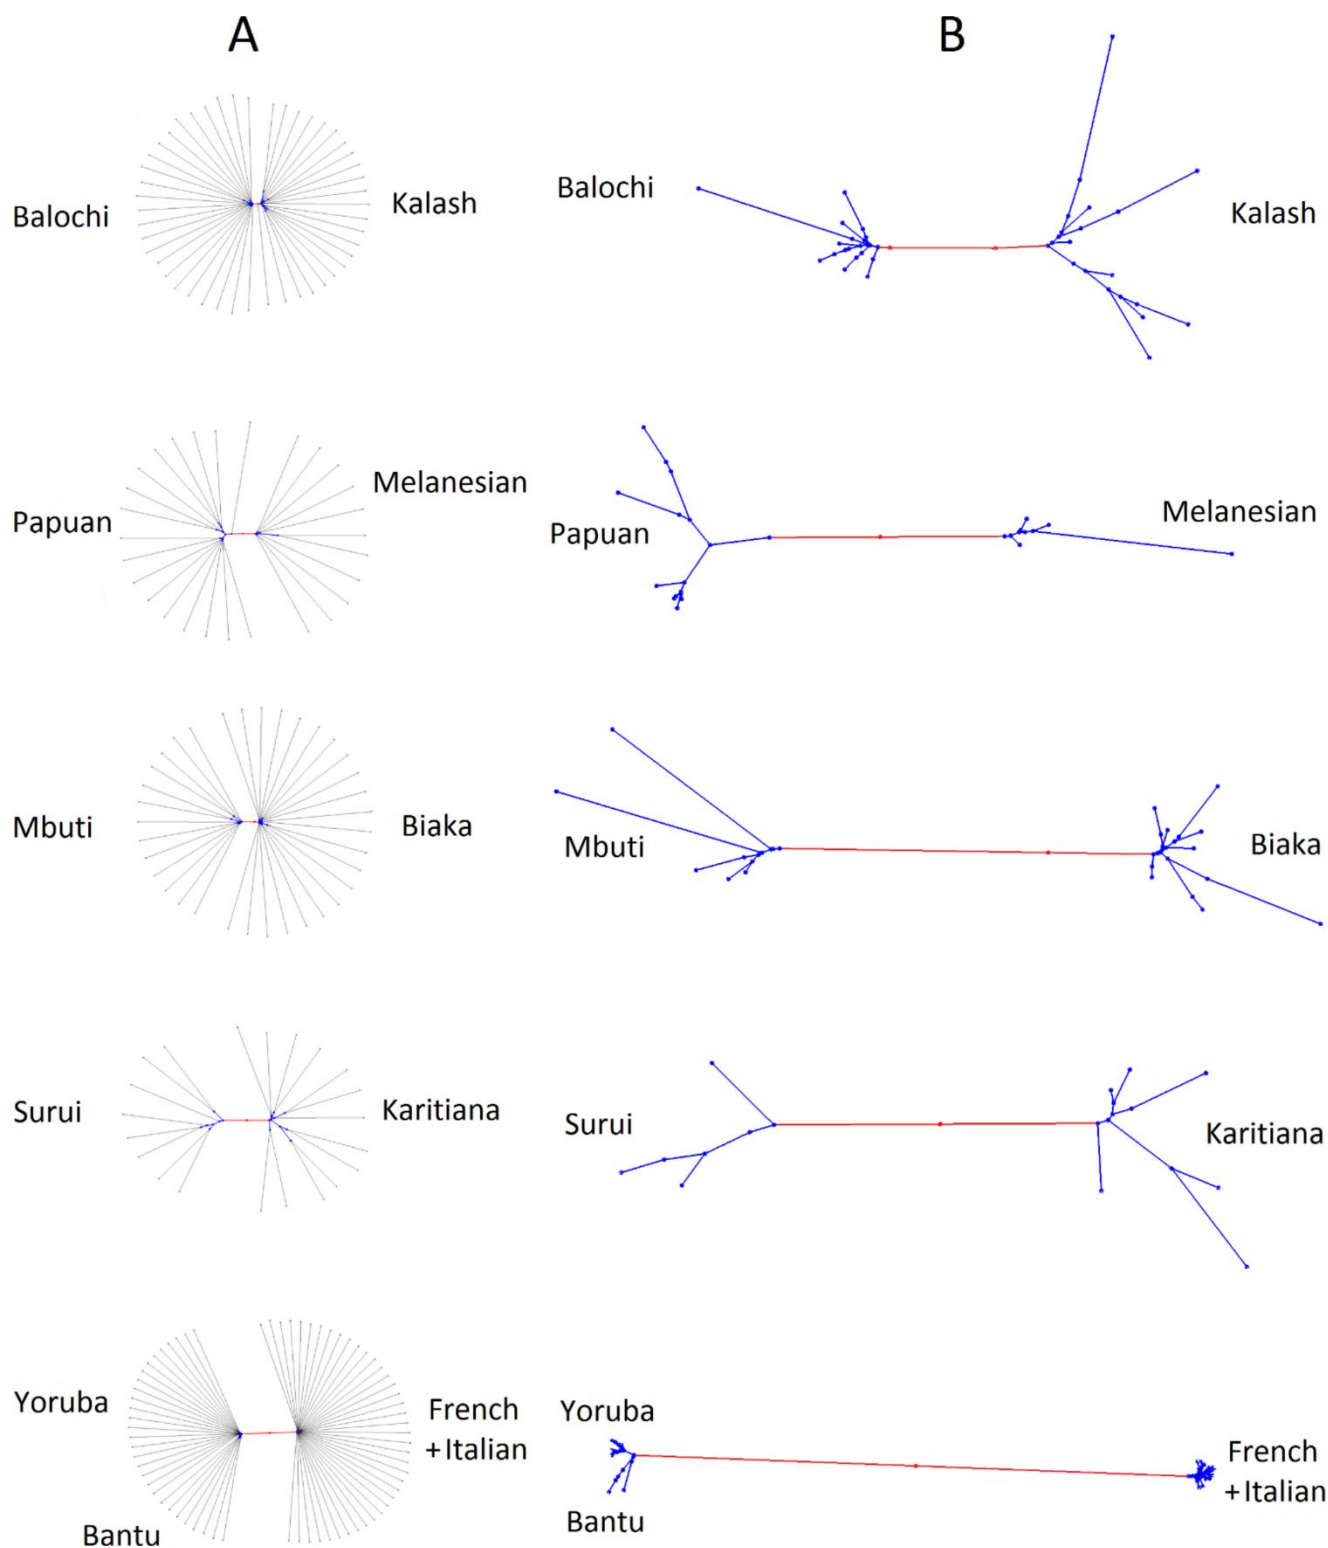

**Figure S7. Neighbor-Joining trees of individual similarities (from 660,755 SNPs).** Individual branches are black, inter-population branches are red, and intra-population branches are blue. A. Complete trees. B. Zoom into trees with individual branches (black) removed.



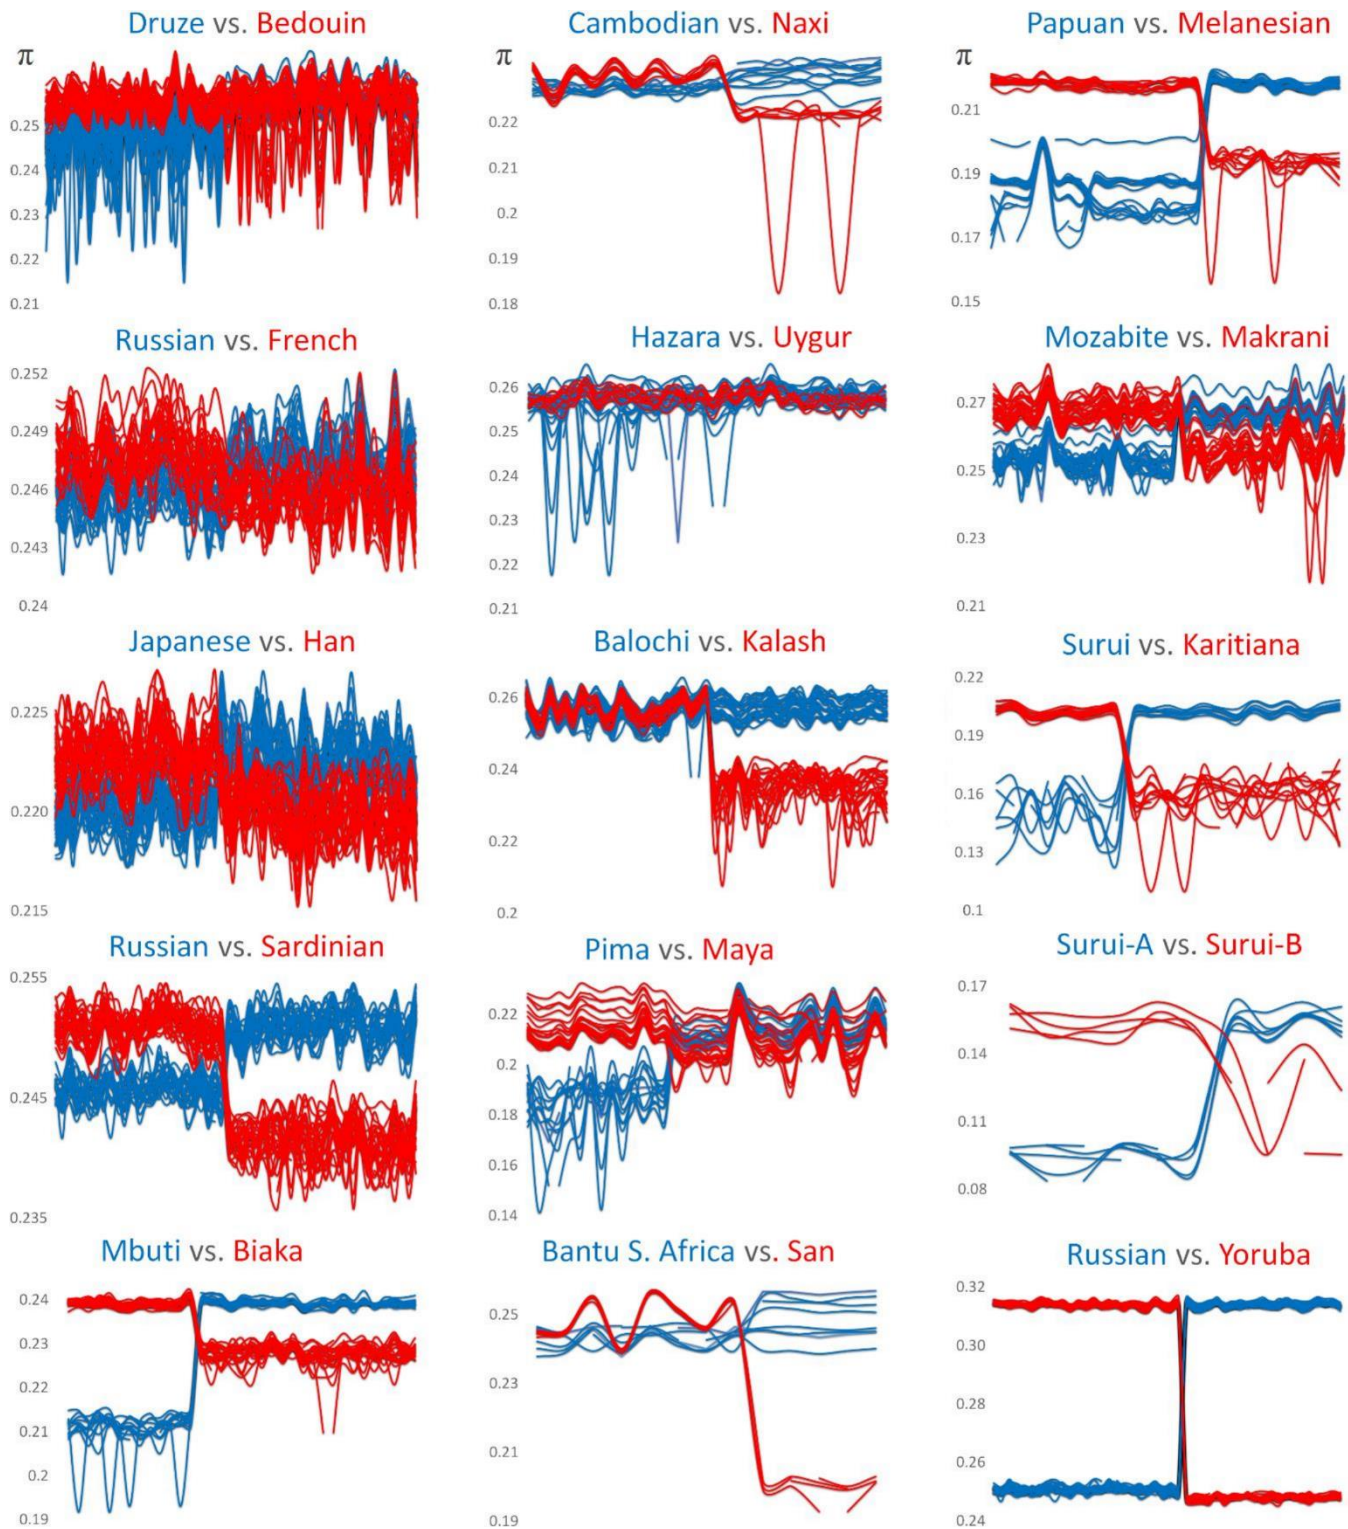

**Figure S8. Pairwise population distance charts.** Each sample is represented by a red or blue string and each point on each string reflects distance between a pair of samples. Points that fall far below the rest (as in the Naxi and Melanesians) are inferred to reflect close relatives.



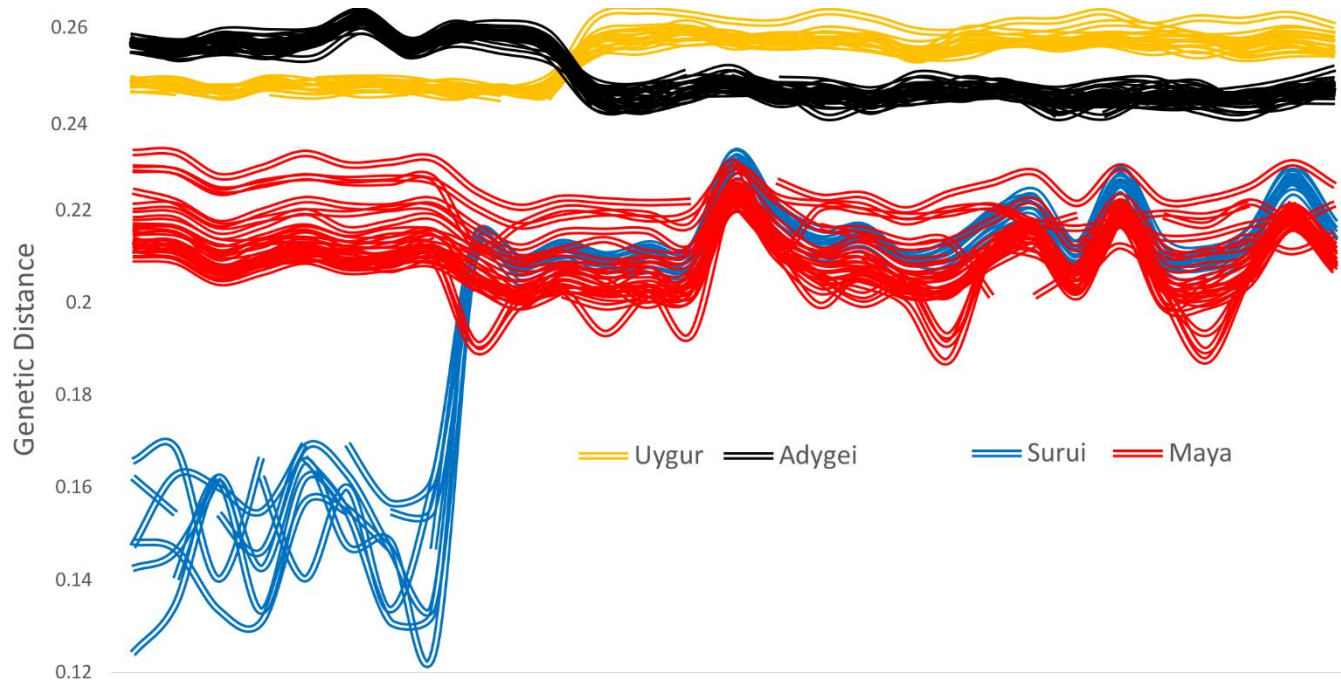

**Figure S9. Superimposed distance plots of Uygur and Adygei (top) and Surui and Maya (bottom).** This is the same kind of plot as in Figure S8, with each string representing a single individual and each population represented by a different color. Despite a high  $F_{ST}$  of 0.09 ( $E_{ST} = 0.52$ ), some Mayan individuals (red) are genetically closer to some Surui individuals (blue) than to some fellow Mayan individuals ( $\omega > 0$ ), presumably due to outbreeding (some Mayan individuals have significant European admixture, which increases distances among Mayans). There is no such overlap between Uygur (yellow) and Adygei (black) samples ( $\omega = 0$ ) despite a much lower pairwise  $F_{ST}$  of 0.02 ( $E_{ST} = 0.79$ ).

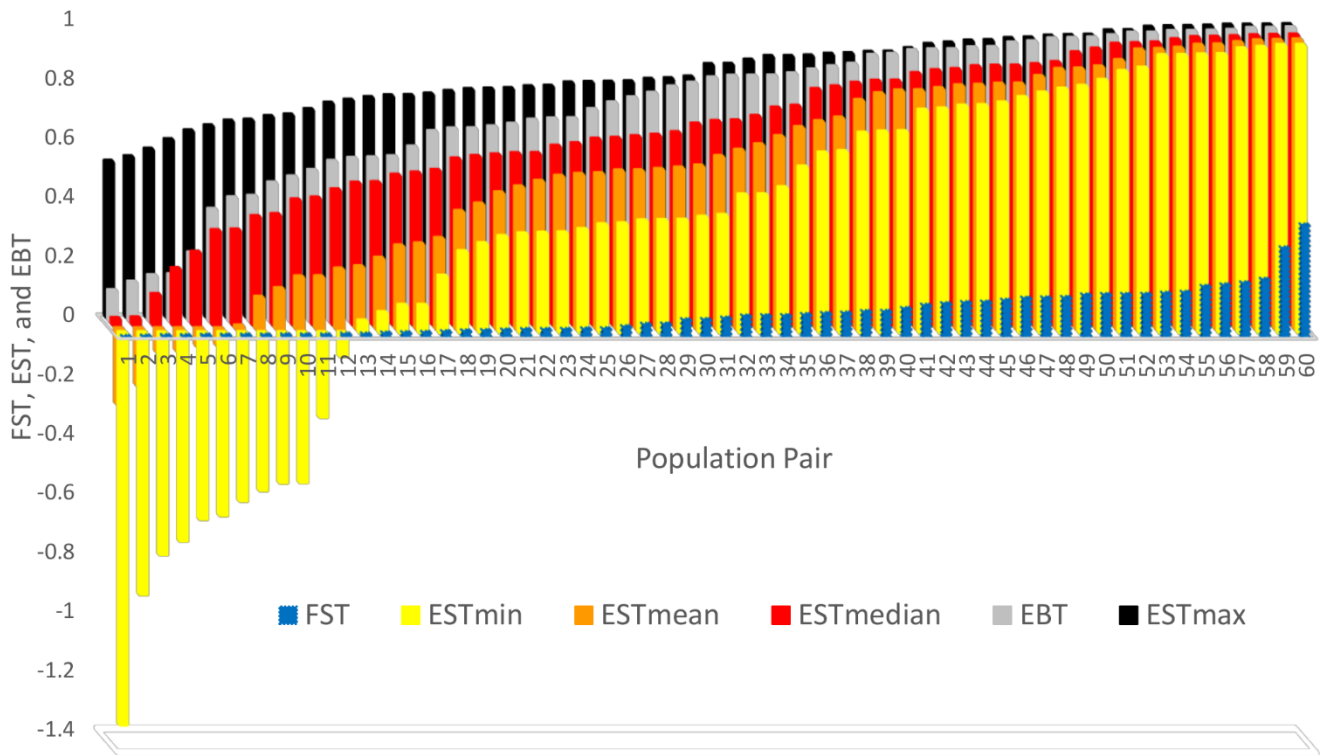

**Figure S10. Overview of  $F_{ST}$ ,  $E_{ST}$  and  $E_{BT}$  among 60 HGDP population pairs (660,755 SNPs).** Negative  $E_{STmin}$  (yellow) and  $E_{STmean}$  (orange) would imply that close relatives were included among these samples. Of the 60 population pairs, 12 (20%) have negative  $E_{STmin}$  and 6 have negative  $E_{STmean}$  values.  $E_{STmedian}$ ,  $E_{STmax}$ , and  $E_{BT}$  cover virtually the entire 0-1 range with no negative values in these samples. The general trend is  $F_{ST} < E_{STmin} < E_{STmean} < E_{STmedian} < E_{STmax}$ .  $E_{BT}$  (gray) is usually somewhere between  $E_{STmedian}$  (red) and  $E_{STmax}$  (black).

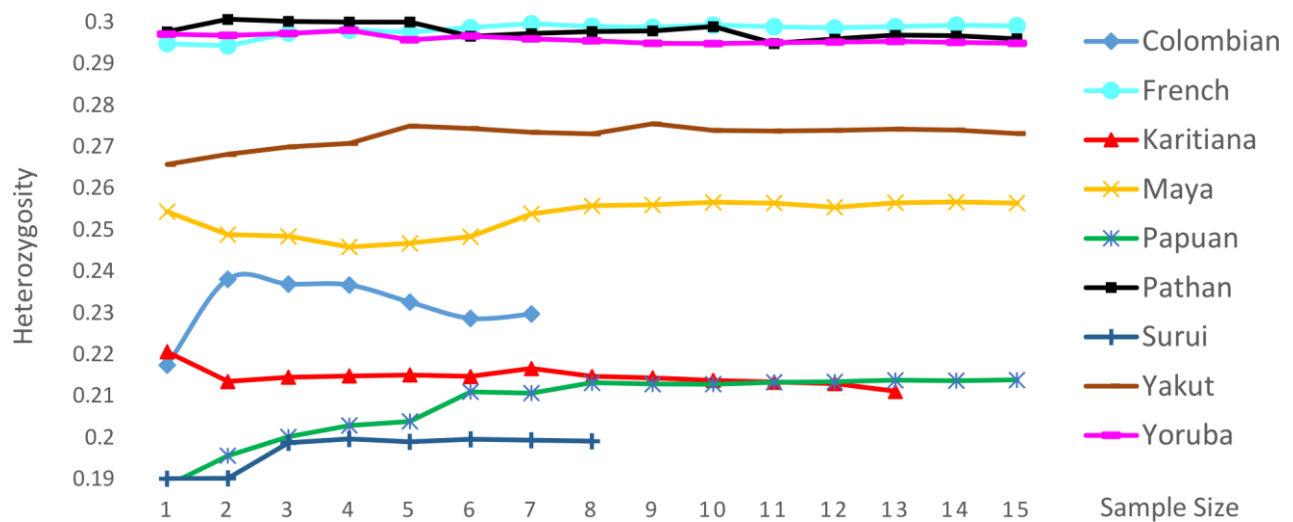

**Figure S11. Mean heterozygosity as a function of sample size.** Heterozygosity in various HGDP populations with sample size increasing from 1 to 15. All samples were included in populations with less than 15 samples (7 in Colombians, 8 in Surui, and 13 in Karitiana).

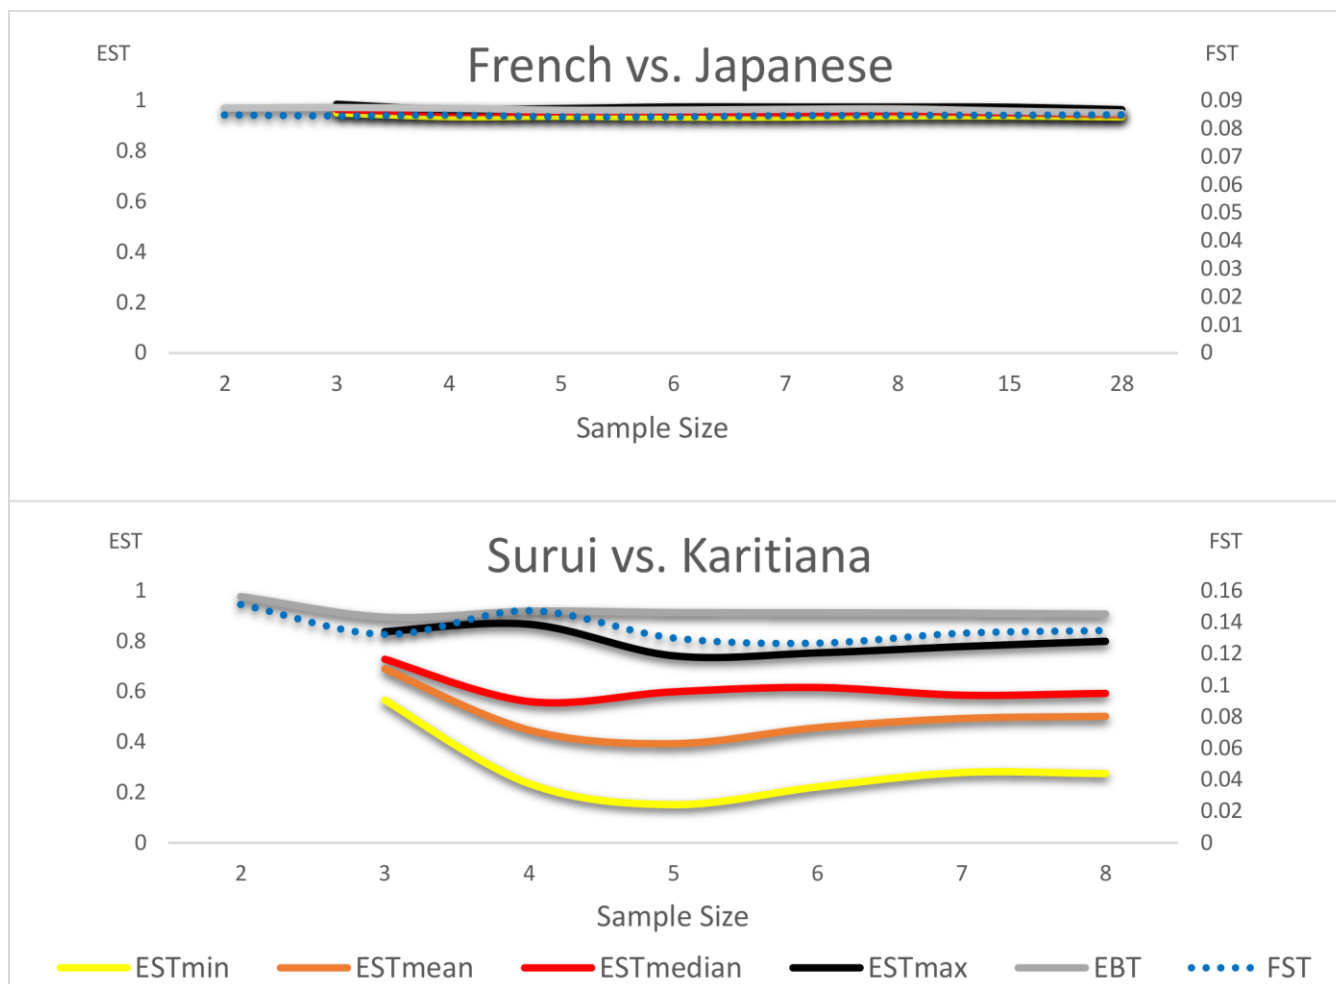

**Figure S12. Pairwise  $F_{ST}$ ,  $E_{ST}$  and  $E_{BT}$  as a function of sample size.** Differentiation was estimated in two population pairs: French-Japanese and Surui-Karitiana, with population sample sizes ranging from  $n=2$  to  $n=8$ . French-Japanese estimates were also taken at  $n=15$  and  $n=28$  due to their larger samples.  $F_{ST}$  and  $E_{BT}$  start at  $n=2$ ;  $E_{ST}$  starts at  $n=3$ , the minimal sample size for estimating the SD of pairwise distances.
